# Supplementary material for: Use of Low‐Density Lipoprotein–Lowering Therapies Before and After PCSK9 Inhibitor Initiation
Source: PubMed Central journal article supplement — J Am Heart Assoc. 2020 Apr 24;9(9):e014347. doi: 10.1161/JAHA.119.014347 (PMC7428552; doi:10.1161/jaha.119.014347), 2020-04-24
Supplement: JAH3-9-e014347-s001.pdf [file JAH3-9-e014347-s001.pdf]

# **SUPPLEMENTAL MATERIAL**

Figure S1. Illustration of PCSK9i Interruption Definition.

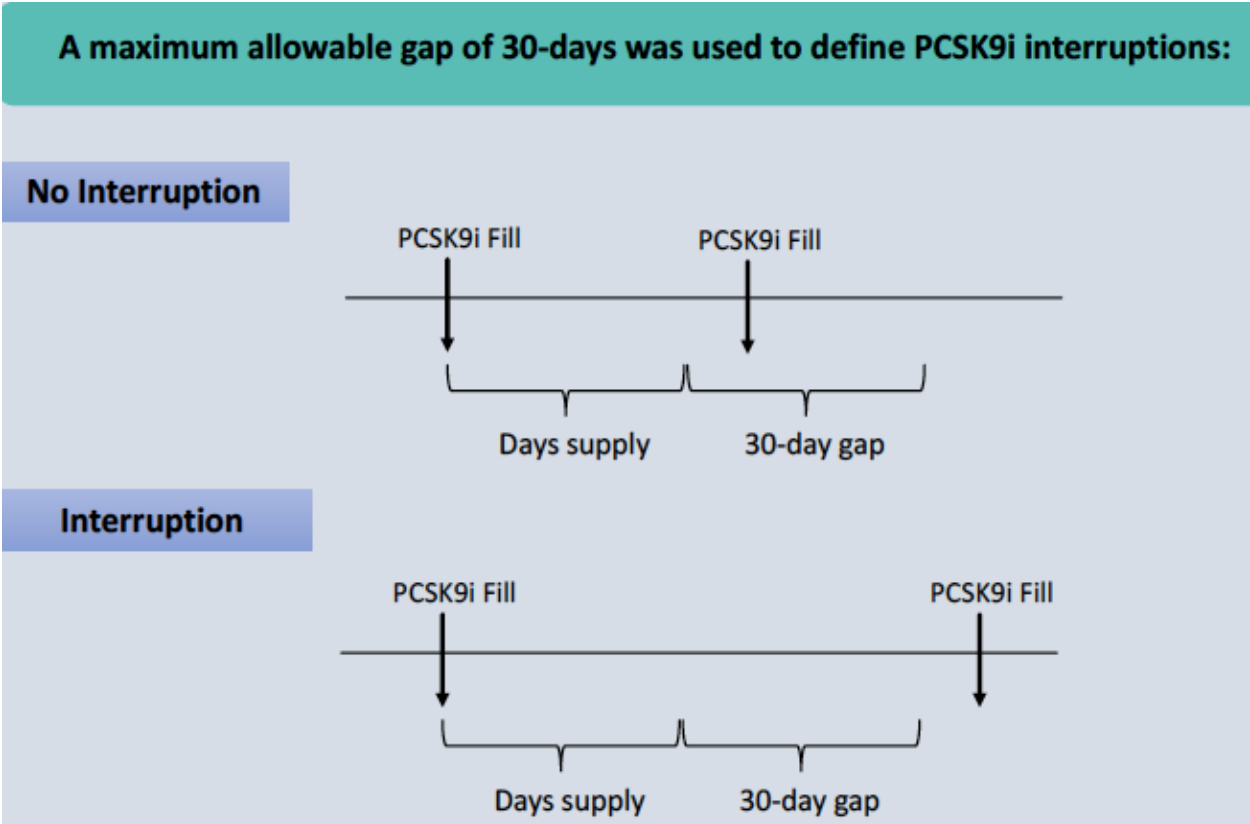

This figure illustrates how an interruption was defined in this analysis.

**Figure S2. Factors Associated with Resuming a PCSK9i after Interruption.**

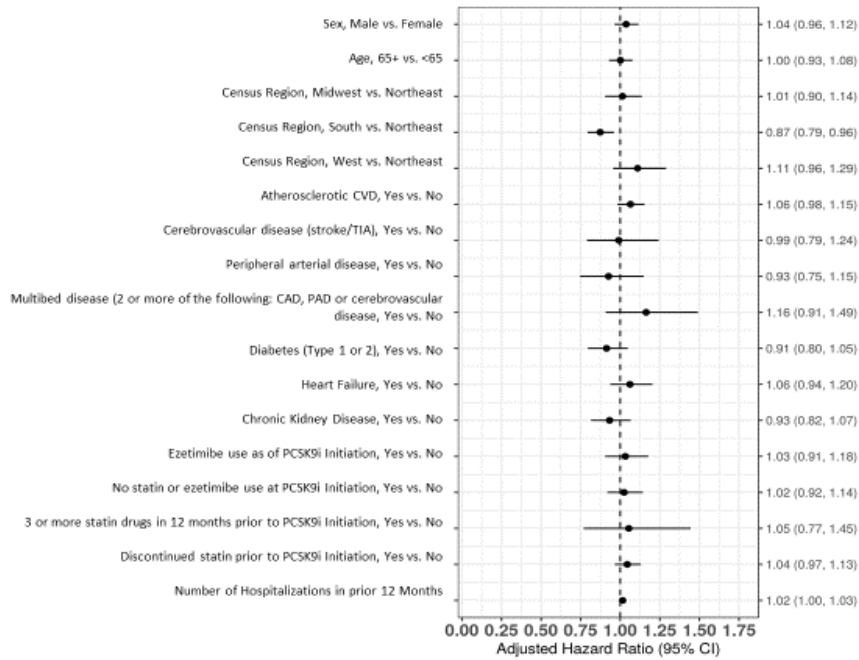

In this figure, residence in the South versus Northeast census region was the only factor associated with a lower likelihood of treatment resumption and no factors were associated with a higher likelihood of treatment resumption. (CVD=cardiovascular disease, TIA=transient ischemic attack, CAD=coronary artery disease, PAD=peripheral artery disease, PCSK9i= Proprotein convertase subtilisin/kexin type 9 inhibitors)
